# Supplementary material for: The adsorption characteristics and mechanism of montmorillonite with different layer charge density for alkyl ammonium with different carbon chain length
Source: Royal Society of Chemistry journal article supplement (doi:10.1039/d1nj01683k), 2021-01-01
Supplement: d1nj01683k1.pdf [file d1nj01683k1.pdf]

Electronic Supplementary Information for

**The adsorption characteristics and mechanism of montmorillonite with different layer charge density for alkyl ammonium with different carbon chain length**

**Jun Qiu<sup>a,\*</sup>, Kaibo Cui<sup>a</sup>, Peng Wu<sup>a</sup>, Guowei Chen<sup>b</sup>, Yueting Wang<sup>b</sup>, Dongliang Liu<sup>b</sup>, Shan Jiang<sup>b</sup> and Guifang Wang<sup>c,\*</sup>**

<sup>a</sup> College of Chemical and Biological Engineering, Shandong University of Science and Technology, Qingdao, 266590, China, qiujun@sdust.edu.cn, ananhu0203@gmail.com, ldlwupeng@gmail.com

<sup>b</sup> College of Safety and Environmental Engineering, Shandong University of Science and Technology, Qingdao 266590, China, wei771941279@gmail.com, wangyueting1026@gmail.com, 1925706004ldl@gmail.com, jiangshan190815@gmail.com

<sup>c</sup> School of Resources Environment and Materials, Guangxi University, Nanning 530004, China, wangguifang66@163.com

**Table S1.** Chemical composition of two kinds of Ca-MT (wt%).

**Table S2.** Changes in the adsorbance of Na-MT1 for DTAC at different exchange time.

**Table S3.** Changes in the adsorbance of Na-MT1 for TTAC at different exchange time.

**Table S4.** Changes in the adsorbance of Na-MT1 for CTAC at different exchange time.

**Table S5.** Changes in the adsorbance of Na-MT1 for OTAC at different exchange time.

**Table S6.** Changes in the adsorbance of Na-MT2 for DTAC at different exchange time.

**Table S7.** Changes in the adsorbance of Na-MT2 for TTAC at different exchange time.

**Table S8.** Changes in the adsorbance of Na-MT2 for CTAC at different exchange time.

**Table S9.** Changes in the adsorbance of Na-MT2 for OTAC at different exchange time.

**Table S10.** Quasi-second-order dynamics parameters for the adsorption of Na-MT1 for alkyl ammonium with different carbon chain length.

**Table S11.** Quasi-second-order dynamics parameters for the adsorption of Na-MT2 for alkyl ammonium with different carbon chain length.

**Table S12.** Isothermal adsorption of Na-MT1 for DTAC at different temperature.

**Table S13.** Isothermal adsorption of Na-MT1 for TTAC at different temperature.

**Table S14.** Isothermal adsorption of Na-MT1 for CTAC at different temperature.

**Table S15.** Isothermal adsorption of Na-MT1 for OTAC at different temperature.

**Table S16.** Isothermal adsorption of Na-MT2 for DTAC at different temperature.

**Table S17.** Isothermal adsorption of Na-MT2 for TTAC at different temperature.

**Table S18.** Isothermal adsorption of Na-MT2 for CTAC at different temperature.

**Table S19.** Isothermal adsorption of Na-MT2 for OTAC at different temperature.

**Table S20.** Adsorption thermodynamic parameters of Na-MT1 for DTAC.

**Table S21.** Adsorption thermodynamic parameters of Na-MT1 for TTAC.

**Table S22.** Adsorption thermodynamic parameters of Na-MT1 for CTAC.

**Table S23.** Adsorption thermodynamic parameters of Na-MT1 for OTAC.

**Table S24.** Adsorption thermodynamic parameters of Na-MT2 for DTAC.

**Table S25.** Adsorption thermodynamic parameters of Na-MT2 for TTAC.

**Table S26.** Adsorption thermodynamic parameters of Na-MT2 for CTAC.

**Table S27.** Adsorption thermodynamic parameters of Na-MT2 for OTAC.

**Figure S1.** XRD patterns of different types of MT.

**Figure S2.** XRD patterns of alkylammonium/Na-MT1 prepared under different conditions, (a)0.7 CEC, DTAC/MT1, (b) 0.7 CEC, TTAC/MT1, (c)0.7 CEC, CTAC/MT1, (d) 1.3 CEC, DTAC/MT1, (e)1.3 CEC, TTAC/MT1, (f)1.3 CEC, CTAC/MT1, (g)3.0 CEC, DTAC/MT1, (h)3.0 CEC, TTAC/MT1, (i)3.0 CEC, CTAC/MT1.

**Table S1.** Chemical composition of two kinds of Ca-MT (wt%).

| Type   | SiO <sub>2</sub> | Al <sub>2</sub> O <sub>3</sub> | MgO  | Na <sub>2</sub> O | Fe <sub>2</sub> O <sub>3</sub> | K <sub>2</sub> O | CaO  | TiO <sub>2</sub> |
|--------|------------------|--------------------------------|------|-------------------|--------------------------------|------------------|------|------------------|
| Ca-MT1 | 68.65            | 16.04                          | 4.15 | 1.99              | 2.98                           | 2.86             | 3.33 | 0                |
| Ca-MT2 | 66.83            | 18.79                          | 6.44 | 0.34              | 2.80                           | 0.41             | 3.98 | 0.41             |

**Table S2.** Changes in the adsorbance of Na-MT1 for DTAC at different exchange time.

| Time, min  |                         | 0      | 0.5    | 1      | 3      | 5      | 15     | 30     |
|------------|-------------------------|--------|--------|--------|--------|--------|--------|--------|
| 0.7<br>CEC | Concentration<br>mmol/L | 7.875  | 1.363  | 0.563  | 0.250  | 0.200  | 0.213  | 0.200  |
|            | Adsorbance<br>mmol/g    | 0.000  | 0.521  | 0.585  | 0.610  | 0.614  | 0.613  | 0.614  |
| 1.3<br>CEC | Concentration<br>mmol/L | 14.625 | 5.425  | 3.725  | 2.213  | 2.000  | 2.013  | 2.025  |
|            | Adsorbance<br>mmol/g    | 0.000  | 0.736  | 0.872  | 0.993  | 1.010  | 1.009  | 1.008  |
| 3.0<br>CEC | Concentration<br>mmol/L | 33.750 | 17.413 | 15.600 | 14.888 | 14.738 | 14.588 | 14.250 |
|            | Adsorbance<br>mmol/g    | 0.000  | 1.307  | 1.452  | 1.509  | 1.521  | 1.533  | 1.560  |

**Table S3.** Changes in the adsorbance of Na-MT1 for TTAC at different exchange time.

| Time, min  |                         | 0      | 0.5    | 1      | 3      | 5      | 15     | 30     |
|------------|-------------------------|--------|--------|--------|--------|--------|--------|--------|
| 0.7<br>CEC | Concentration<br>mmol/L | 7.875  | 1.113  | 0.575  | 0.225  | 0.225  | 0.213  | 0.225  |
|            | Adsorbance<br>mmol/g    | 0.000  | 0.541  | 0.584  | 0.612  | 0.612  | 0.613  | 0.612  |
| 1.3<br>CEC | Concentration<br>mmol/L | 14.625 | 3.975  | 2.488  | 2.013  | 1.850  | 1.850  | 1.850  |
|            | Adsorbance<br>mmol/g    | 0.000  | 0.852  | 0.971  | 1.009  | 1.022  | 1.022  | 1.022  |
| 3.0<br>CEC | Concentration<br>mmol/L | 33.750 | 16.650 | 14.638 | 14.113 | 13.713 | 13.038 | 13.050 |
|            | Adsorbance<br>mmol/g    | 0.000  | 1.368  | 1.529  | 1.571  | 1.603  | 1.657  | 1.656  |

**Table S4.** Changes in the adsorbance of Na-MT1 for CTAC at different exchange time.

| Time, min  |                         | 0      | 0.5    | 1      | 3      | 5     | 15    | 30    |
|------------|-------------------------|--------|--------|--------|--------|-------|-------|-------|
| 0.7<br>CEC | Concentration<br>mmol/L | 7.875  | 0.775  | 0.475  | 0.188  | 0.188 | 0.175 | 0.175 |
|            | Adsorbance<br>mmol/g    | 0.000  | 0.568  | 0.592  | 0.615  | 0.615 | 0.616 | 0.616 |
| 1.3<br>CEC | Concentration<br>mmol/L | 14.625 | 2.950  | 1.813  | 0.863  | 0.800 | 0.788 | 0.800 |
|            | Adsorbance<br>mmol/g    | 0.000  | 0.934  | 1.025  | 1.101  | 1.106 | 1.107 | 1.106 |
| 3.0<br>CEC | Concentration<br>mmol/L | 33.750 | 13.350 | 10.925 | 10.113 | 9.538 | 9.350 | 9.338 |
|            | Adsorbance<br>mmol/g    | 0.000  | 1.632  | 1.826  | 1.891  | 1.937 | 1.952 | 1.953 |

**Table S5.** Changes in the adsorbance of Na-MT1 for OTAC at different exchange time.

| <b>Time, min</b> |                         | <b>0</b> | <b>0.5</b> | <b>1</b> | <b>3</b> | <b>5</b> | <b>15</b> | <b>30</b> |
|------------------|-------------------------|----------|------------|----------|----------|----------|-----------|-----------|
| 0.7<br>CEC       | Concentration<br>mmol/L | 7.875    | 0.363      | 0.138    | 0.125    | 0.125    | 0.113     | 0.125     |
|                  | Adsorbance<br>mmol/g    | 0.000    | 0.601      | 0.619    | 0.620    | 0.620    | 0.621     | 0.620     |
| 1.3<br>CEC       | Concentration<br>mmol/L | 14.625   | 2.325      | 1.688    | 0.638    | 0.613    | 0.600     | 0.588     |
|                  | Adsorbance<br>mmol/g    | 0.000    | 0.984      | 1.035    | 1.119    | 1.121    | 1.122     | 1.123     |
| 3.0<br>CEC       | Concentration<br>mmol/L | 33.750   | 13.013     | 10.988   | 8.900    | 8.725    | 8.563     | 8.575     |
|                  | Adsorbance<br>mmol/g    | 0.000    | 1.659      | 1.821    | 1.988    | 2.002    | 2.015     | 2.014     |

**Table S6.** Changes in the adsorbance of Na-MT2 for DTAC at different exchange time.

| <b>Time, min</b>   |                         | <b>0</b> | <b>0.5</b> | <b>1</b> | <b>3</b> | <b>5</b> | <b>15</b> | <b>30</b> |
|--------------------|-------------------------|----------|------------|----------|----------|----------|-----------|-----------|
| 0.7<br>CEC<br>80°C | Concentration<br>mmol/L | 9.538    | 0.526      | 0.426    | 0.176    | 0.188    | 0.176     | 0.176     |
|                    | Adsorbance<br>mmol/g    | 0.000    | 0.721      | 0.729    | 0.749    | 0.748    | 0.749     | 0.749     |
| 1.3<br>CEC<br>80°C | Concentration<br>mmol/L | 17.713   | 3.463      | 2.013    | 1.738    | 1.650    | 1.663     | 1.663     |
|                    | Adsorbance<br>mmol/g    | 0.000    | 1.140      | 1.256    | 1.278    | 1.285    | 1.284     | 1.284     |
| 3.0<br>CEC<br>80°C | Concentration<br>mmol/L | 40.875   | 17.388     | 16.938   | 16.775   | 16.475   | 16.388    | 16.375    |
|                    | Adsorbance<br>mmol/g    | 0.000    | 1.879      | 1.915    | 1.928    | 1.952    | 1.959     | 1.960     |

**Table S7.** Changes in the adsorbance of Na-MT2 for TTAC at different exchange time.

| <b>Time, min</b>   |                         | <b>0</b> | <b>0.5</b> | <b>1</b> | <b>3</b> | <b>5</b> | <b>15</b> | <b>30</b> |
|--------------------|-------------------------|----------|------------|----------|----------|----------|-----------|-----------|
| 0.7<br>CEC<br>80°C | Concentration<br>mmol/L | 9.538    | 0.525      | 0.425    | 0.175    | 0.188    | 0.175     | 0.175     |
|                    | Adsorbance<br>mmol/g    | 0.000    | 0.721      | 0.729    | 0.749    | 0.748    | 0.749     | 0.749     |
| 1.3<br>CEC<br>80°C | Concentration<br>mmol/L | 17.713   | 3.050      | 1.850    | 1.638    | 1.625    | 1.638     | 1.625     |
|                    | Adsorbance<br>mmol/g    | 0.000    | 1.173      | 1.269    | 1.286    | 1.287    | 1.286     | 1.287     |
| 3.0<br>CEC<br>80°C | Concentration<br>mmol/L | 40.875   | 14.525     | 14.388   | 14.213   | 14.063   | 14.050    | 14.063    |
|                    | Adsorbance<br>mmol/g    | 0.000    | 2.108      | 2.119    | 2.133    | 2.145    | 2.146     | 2.145     |

**Table S8.** Changes in the adsorbance of Na-MT2 for CTAC at different exchange time.

| <b>Time, min</b>   |                         | <b>0</b> | <b>0.5</b> | <b>1</b> | <b>3</b> | <b>5</b> | <b>15</b> | <b>30</b> |
|--------------------|-------------------------|----------|------------|----------|----------|----------|-----------|-----------|
| 0.7<br>CEC<br>80°C | Concentration<br>mmol/L | 9.538    | 0.300      | 0.163    | 0.175    | 0.163    | 0.163     | 0.175     |
|                    | Adsorbance<br>mmol/g    | 0.000    | 0.739      | 0.750    | 0.749    | 0.750    | 0.750     | 0.749     |
| 1.3<br>CEC         | Concentration<br>mmol/L | 17.713   | 3.450      | 1.563    | 1.463    | 1.475    | 1.463     | 1.463     |

|      |                         |        |        |        |        |        |        |        |
|------|-------------------------|--------|--------|--------|--------|--------|--------|--------|
| 80°C | Adsorbance<br>mmol/g    | 0.000  | 1.141  | 1.292  | 1.300  | 1.299  | 1.300  | 1.300  |
| 3.0  | Concentration<br>mmol/L | 40.875 | 11.825 | 11.613 | 11.538 | 11.488 | 11.500 | 11.488 |
| CEC  | Adsorbance<br>mmol/g    | 0.000  | 2.324  | 2.341  | 2.347  | 2.351  | 2.350  | 2.351  |

**Table S9.** Changes in the adsorbance of Na-MT2 for OTAC at different exchange time.

| Time, min |                         | 0      | 0.5    | 1      | 3      | 5      | 15     | 30     |
|-----------|-------------------------|--------|--------|--------|--------|--------|--------|--------|
| 0.7       | Concentration<br>mmol/L | 9.538  | 0.125  | 0.125  | 0.137  | 0.137  | 0.137  | 0.125  |
| CEC       | Adsorbance<br>mmol/g    | 0.000  | 0.753  | 0.753  | 0.752  | 0.752  | 0.752  | 0.753  |
| 1.3       | Concentration<br>mmol/L | 17.713 | 3.638  | 1.200  | 0.975  | 0.963  | 0.975  | 0.963  |
| CEC       | Adsorbance<br>mmol/g    | 0.000  | 1.126  | 1.321  | 1.339  | 1.340  | 1.339  | 1.340  |
| 3.0       | Concentration<br>mmol/L | 40.875 | 11.550 | 10.950 | 10.763 | 10.623 | 10.600 | 10.600 |
| CEC       | Adsorbance<br>mmol/g    | 0.000  | 2.346  | 2.394  | 2.409  | 2.420  | 2.422  | 2.422  |

**Table S10.** Quasi-second-order dynamics parameters for the adsorption of Na-MT1 for alkyl ammonium with different carbon chain length.

| Type    | $Q_e(\text{exp})$<br>mmol/g |       |       |       | $q_e$<br>mmol/g |       |       |       | $K$<br>g/(mmol·min) |        |        |        | $R^2$ |      |      |      |
|---------|-----------------------------|-------|-------|-------|-----------------|-------|-------|-------|---------------------|--------|--------|--------|-------|------|------|------|
|         | DTAC                        | TTAC  | CTAC  | OTAC  | DTAC            | TTAC  | CTAC  | OTAC  | DTAC                | TTAC   | CTAC   | OTAC   | DTAC  | TTAC | CTAC | OTAC |
| 0.7 CEC | 0.614                       | 0.613 | 0.616 | 0.620 | 0.613           | 0.612 | 0.615 | 0.620 | 91.97               | 195.11 | 280.87 | 332.08 | 1     | 1    | 1    | 1    |
| 1.3 CEC | 1.010                       | 1.023 | 1.107 | 1.123 | 1.009           | 1.023 | 1.107 | 1.123 | 19.70               | 27.10  | 27.55  | 32.33  | 1     | 1    | 1    | 1    |
| 3.0 CEC | 1.560                       | 1.657 | 1.953 | 2.016 | 1.560           | 1.657 | 1.953 | 2.015 | 7.07                | 7.87   | 10.41  | 12.87  | 1     | 1    | 1    | 1    |

**Table S11.** Quasi-second-order dynamics parameters for the adsorption of Na-MT2 for alkyl ammonium with different carbon chain length.

| Type    | $Q_e(\text{exp})$<br>mmol/g |       |       |       | $q_e$<br>mmol/g |       |       |       | $K$<br>g/(mmol·min) |        |        |        | $R^2$ |      |      |      |
|---------|-----------------------------|-------|-------|-------|-----------------|-------|-------|-------|---------------------|--------|--------|--------|-------|------|------|------|
|         | DTAC                        | TTAC  | CTAC  | OTAC  | DTAC            | TTAC  | CTAC  | OTAC  | DTAC                | TTAC   | CTAC   | OTAC   | DTAC  | TTAC | CTAC | OTAC |
| 0.7 CEC | 0.749                       | 0.752 | 0.750 | 0.752 | 0.749           | 0.749 | 0.750 | 0.753 | 96.30               | 319.21 | 375.27 | 984.38 | 1     | 1    | 1    | 1    |
| 1.3 CEC | 1.285                       | 1.287 | 1.300 | 1.340 | 1.285           | 1.287 | 1.300 | 1.340 | 37.37               | 60.76  | 79.63  | 114.02 | 1     | 1    | 1    | 1    |
| 3.0 CEC | 1.959                       | 2.146 | 2.351 | 2.422 | 1.959           | 2.146 | 2.351 | 2.422 | 34.86               | 37.93  | 39.62  | 42.21  | 1     | 1    | 1    | 1    |

**Table S12.** Isothermal adsorption of Na-MT1 for DTAC at different temperature.

| Amount | Adsorbance, mmol/g |       |       |       |  | Equilibrium<br>concentration, mmol/L |       |       | Adsorption efficiency $\eta$ , % |       |       |
|--------|--------------------|-------|-------|-------|--|--------------------------------------|-------|-------|----------------------------------|-------|-------|
|        | mmol/g             | 25°C  | 50°C  | 80°C  |  | 25°C                                 | 50°C  | 80°C  | 25°C                             | 50°C  | 80°C  |
| 0.50   | 0.45               | 0.447 | 0.446 | 0.445 |  | 0.011                                | 0.012 | 0.016 | 99.27                            | 99.19 | 98.95 |
| 0.70   | 0.63               | 0.626 | 0.625 | 0.624 |  | 0.013                                | 0.018 | 0.019 | 99.36                            | 99.14 | 99.08 |
| 1.00   | 0.90               | 0.887 | 0.887 | 0.886 |  | 0.042                                | 0.042 | 0.048 | 98.60                            | 98.60 | 98.40 |

|      |      |       |       |       |       |       |       |       |       |       |
|------|------|-------|-------|-------|-------|-------|-------|-------|-------|-------|
| 1.30 | 1.17 | 1.045 | 1.043 | 1.042 | 0.117 | 0.123 | 0.128 | 96.75 | 96.59 | 96.45 |
| 1.50 | 1.35 | 1.250 | 1.247 | 1.246 | 0.335 | 0.342 | 0.347 | 92.56 | 92.40 | 92.30 |
| 1.70 | 1.53 | 1.397 | 1.391 | 1.387 | 0.444 | 0.462 | 0.475 | 91.30 | 90.94 | 90.68 |
| 2.00 | 1.80 | 1.495 | 1.491 | 1.485 | 1.017 | 1.031 | 1.051 | 83.06 | 82.82 | 82.48 |
| 2.30 | 2.07 | 1.577 | 1.552 | 1.534 | 1.645 | 1.728 | 1.788 | 76.16 | 74.95 | 74.09 |
| 2.50 | 2.25 | 1.642 | 1.599 | 1.535 | 2.027 | 2.170 | 2.384 | 72.97 | 71.07 | 68.21 |
| 2.80 | 2.52 | 1.640 | 1.591 | 1.558 | 2.934 | 3.096 | 3.207 | 65.07 | 63.15 | 61.82 |
| 3.00 | 2.70 | 1.641 | 1.593 | 1.557 | 3.530 | 3.689 | 3.808 | 60.78 | 59.01 | 57.68 |

**Table S13.** Isothermal adsorption of Na-MT1 for TTAC at different temperature.

| Amount |        | Adsorbance, mmol/g |       |       | Equilibrium concentration, mmol/L |       |       | Adsorption efficiency $\eta$ , % |       |       |
|--------|--------|--------------------|-------|-------|-----------------------------------|-------|-------|----------------------------------|-------|-------|
| CEC    | mmol/g | 25°C               | 50°C  | 80°C  | 25°C                              | 50°C  | 80°C  | 25°C                             | 50°C  | 80°C  |
| 0.50   | 0.45   | 0.447              | 0.446 | 0.446 | 0.009                             | 0.012 | 0.013 | 99.39                            | 99.22 | 99.13 |
| 0.70   | 0.63   | 0.623              | 0.623 | 0.622 | 0.022                             | 0.025 | 0.026 | 98.95                            | 98.83 | 98.77 |
| 1.00   | 0.90   | 0.891              | 0.891 | 0.890 | 0.031                             | 0.031 | 0.035 | 98.97                            | 98.97 | 98.84 |
| 1.30   | 1.17   | 1.048              | 1.043 | 1.042 | 0.108                             | 0.122 | 0.127 | 97.00                            | 96.61 | 96.47 |
| 1.50   | 1.35   | 1.278              | 1.266 | 1.263 | 0.240                             | 0.279 | 0.291 | 94.67                            | 93.81 | 93.53 |
| 1.70   | 1.53   | 1.428              | 1.409 | 1.409 | 0.340                             | 0.404 | 0.404 | 93.33                            | 92.07 | 92.07 |
| 2.00   | 1.80   | 1.552              | 1.536 | 1.533 | 0.828                             | 0.879 | 0.892 | 86.21                            | 85.35 | 85.14 |
| 2.30   | 2.07   | 1.633              | 1.633 | 1.629 | 1.456                             | 1.456 | 1.469 | 78.90                            | 78.90 | 78.71 |
| 2.50   | 2.25   | 1.705              | 1.667 | 1.648 | 1.815                             | 1.943 | 2.008 | 75.80                            | 74.09 | 73.23 |
| 2.80   | 2.52   | 1.733              | 1.687 | 1.675 | 2.623                             | 2.777 | 2.816 | 68.77                            | 66.94 | 66.48 |
| 3.00   | 2.70   | 1.744              | 1.674 | 1.663 | 3.188                             | 3.419 | 3.457 | 64.58                            | 62.02 | 61.59 |

**Table S14.** Isothermal adsorption of Na-MT1 for CTAC at different temperature.

| Amount |        | Adsorbance, mmol/g |       |       | Equilibrium concentration, mmol/L |       |       | Adsorption efficiency $\eta$ , % |       |       |
|--------|--------|--------------------|-------|-------|-----------------------------------|-------|-------|----------------------------------|-------|-------|
| CEC    | mmol/g | 25°C               | 50°C  | 80°C  | 25°C                              | 50°C  | 80°C  | 25°C                             | 50°C  | 80°C  |
| 0.50   | 0.45   | 0.448              | 0.447 | 0.447 | 0.008                             | 0.010 | 0.011 | 99.47                            | 99.36 | 99.25 |
| 0.70   | 0.63   | 0.626              | 0.626 | 0.624 | 0.013                             | 0.014 | 0.021 | 99.39                            | 99.31 | 99.00 |
| 1.00   | 0.90   | 0.893              | 0.893 | 0.892 | 0.023                             | 0.024 | 0.026 | 99.24                            | 99.19 | 99.14 |
| 1.30   | 1.17   | 1.072              | 1.071 | 1.070 | 0.028                             | 0.031 | 0.034 | 99.23                            | 99.14 | 99.05 |
| 1.50   | 1.35   | 1.339              | 1.337 | 1.334 | 0.036                             | 0.045 | 0.055 | 99.21                            | 99.00 | 98.78 |
| 1.70   | 1.53   | 1.506              | 1.499 | 1.493 | 0.080                             | 0.102 | 0.125 | 98.43                            | 98.00 | 97.55 |
| 2.00   | 1.80   | 1.746              | 1.734 | 1.728 | 0.180                             | 0.220 | 0.240 | 97.01                            | 96.33 | 96.00 |
| 2.30   | 2.07   | 1.934              | 1.922 | 1.910 | 0.454                             | 0.494 | 0.534 | 93.41                            | 92.84 | 92.26 |
| 2.50   | 2.25   | 1.885              | 1.880 | 1.870 | 1.217                             | 1.235 | 1.266 | 83.78                            | 83.53 | 83.12 |
| 2.80   | 2.52   | 1.955              | 1.937 | 1.920 | 1.884                             | 1.944 | 2.000 | 77.57                            | 76.86 | 76.19 |
| 3.00   | 2.70   | 2.045              | 1.959 | 1.934 | 2.183                             | 2.470 | 2.555 | 75.74                            | 72.56 | 71.61 |

**Table S15.** Isothermal adsorption of Na-MT1 for OTAC at different temperature.

| Amount |  | Adsorbance, mmol/g |  |  | Equilibrium concentration, mmol/L |  |  | Adsorption efficiency $\eta$ , % |  |  |
|--------|--|--------------------|--|--|-----------------------------------|--|--|----------------------------------|--|--|
|--------|--|--------------------|--|--|-----------------------------------|--|--|----------------------------------|--|--|

| CEC  | mmol/g | 25°C  | 50°C  | 80°C  | 25°C  | 50°C  | 80°C  | 25°C  | 50°C  | 80°C  |
|------|--------|-------|-------|-------|-------|-------|-------|-------|-------|-------|
| 0.50 | 0.45   | 0.448 | 0.448 | 0.447 | 0.006 | 0.007 | 0.010 | 99.62 | 99.52 | 99.34 |
| 0.70 | 0.63   | 0.627 | 0.627 | 0.626 | 0.009 | 0.011 | 0.014 | 99.59 | 99.48 | 99.32 |
| 1.00 | 0.90   | 0.897 | 0.895 | 0.895 | 0.011 | 0.016 | 0.016 | 99.62 | 99.48 | 99.48 |
| 1.30 | 1.17   | 1.074 | 1.073 | 1.071 | 0.021 | 0.023 | 0.030 | 99.41 | 99.37 | 99.17 |
| 1.50 | 1.35   | 1.337 | 1.335 | 1.330 | 0.043 | 0.051 | 0.065 | 99.06 | 98.87 | 98.55 |
| 1.70 | 1.53   | 1.507 | 1.504 | 1.496 | 0.075 | 0.086 | 0.115 | 98.53 | 98.31 | 97.75 |
| 2.00 | 1.80   | 1.762 | 1.758 | 1.745 | 0.126 | 0.140 | 0.183 | 97.90 | 97.66 | 96.96 |
| 2.30 | 2.07   | 1.971 | 1.956 | 1.944 | 0.330 | 0.379 | 0.422 | 95.22 | 94.50 | 93.89 |
| 2.50 | 2.25   | 2.011 | 1.998 | 1.994 | 0.798 | 0.840 | 0.855 | 89.36 | 88.80 | 88.61 |
| 2.80 | 2.52   | 2.039 | 2.034 | 2.026 | 1.604 | 1.618 | 1.647 | 80.90 | 80.73 | 80.40 |
| 3.00 | 2.70   | 2.084 | 2.036 | 2.021 | 2.053 | 2.213 | 2.265 | 77.19 | 75.42 | 74.83 |

**Table S16.** Isothermal adsorption of Na-MT2 for DTAC at different temperature.

| Amount | Adsorbance, mmol/g | Equilibrium           |       |       | Adsorption efficiency $\eta$ , % |       |       |       |       |       |
|--------|--------------------|-----------------------|-------|-------|----------------------------------|-------|-------|-------|-------|-------|
|        |                    | concentration, mmol/L |       |       | 25°C                             | 50°C  | 80°C  | 25°C  | 50°C  | 80°C  |
| CEC    | mmol/g             | 25°C                  | 50°C  | 80°C  | 25°C                             | 50°C  | 80°C  | 25°C  | 50°C  | 80°C  |
| 0.50   | 0.55               | 0.543                 | 0.542 | 0.542 | 0.011                            | 0.015 | 0.017 | 99.60 | 99.47 | 99.38 |
| 0.70   | 0.76               | 0.759                 | 0.758 | 0.757 | 0.021                            | 0.024 | 0.029 | 99.46 | 99.37 | 99.24 |
| 1.00   | 1.09               | 1.074                 | 1.073 | 1.073 | 0.082                            | 0.085 | 0.086 | 98.49 | 98.44 | 98.42 |
| 1.30   | 1.42               | 1.371                 | 1.369 | 1.368 | 0.232                            | 0.242 | 0.247 | 96.72 | 96.59 | 96.52 |
| 1.50   | 1.64               | 1.559                 | 1.557 | 1.552 | 0.380                            | 0.392 | 0.416 | 95.35 | 95.21 | 94.92 |
| 1.70   | 1.85               | 1.739                 | 1.732 | 1.728 | 0.568                            | 0.604 | 0.627 | 93.87 | 93.48 | 93.23 |
| 2.00   | 2.18               | 1.958                 | 1.951 | 1.943 | 1.111                            | 1.145 | 1.184 | 89.81 | 89.49 | 89.13 |
| 2.30   | 2.51               | 2.010                 | 1.980 | 1.961 | 2.484                            | 2.636 | 2.731 | 80.18 | 78.97 | 78.21 |
| 2.50   | 2.73               | 2.082                 | 2.027 | 1.979 | 3.216                            | 3.490 | 3.728 | 76.40 | 74.39 | 72.64 |
| 2.80   | 3.05               | 2.144                 | 2.096 | 2.001 | 4.540                            | 4.778 | 5.254 | 70.25 | 68.69 | 65.57 |
| 3.00   | 3.27               | 2.155                 | 2.119 | 2.024 | 5.576                            | 5.754 | 6.230 | 65.90 | 64.81 | 61.89 |

**Table S17.** Isothermal adsorption of Na-MT2 for TTAC at different temperature.

| Amount | Adsorbance, mmol/g | Equilibrium           |       |       | Adsorption efficiency $\eta$ , % |       |       |       |       |       |
|--------|--------------------|-----------------------|-------|-------|----------------------------------|-------|-------|-------|-------|-------|
|        |                    | concentration, mmol/L |       |       | 25°C                             | 50°C  | 80°C  | 25°C  | 50°C  | 80°C  |
| CEC    | mmol/g             | 25°C                  | 50°C  | 80°C  | 25°C                             | 50°C  | 80°C  | 25°C  | 50°C  | 80°C  |
| 0.50   | 0.55               | 0.543                 | 0.543 | 0.542 | 0.009                            | 0.010 | 0.013 | 99.66 | 99.62 | 99.52 |
| 0.70   | 0.76               | 0.759                 | 0.759 | 0.758 | 0.022                            | 0.021 | 0.026 | 99.42 | 99.46 | 99.32 |
| 1.00   | 1.09               | 1.083                 | 1.083 | 1.082 | 0.035                            | 0.035 | 0.040 | 99.36 | 99.36 | 99.27 |
| 1.30   | 1.42               | 1.405                 | 1.405 | 1.403 | 0.059                            | 0.060 | 0.069 | 99.16 | 99.15 | 99.02 |
| 1.50   | 1.64               | 1.600                 | 1.595 | 1.590 | 0.177                            | 0.198 | 0.223 | 97.83 | 97.58 | 97.27 |
| 1.70   | 1.85               | 1.807                 | 1.802 | 1.799 | 0.231                            | 0.257 | 0.270 | 97.51 | 97.23 | 97.09 |
| 2.00   | 2.18               | 2.056                 | 2.052 | 2.039 | 0.618                            | 0.639 | 0.703 | 94.33 | 94.14 | 93.55 |
| 2.30   | 2.51               | 2.157                 | 2.151 | 2.149 | 1.750                            | 1.779 | 1.790 | 86.04 | 85.81 | 85.72 |
| 2.50   | 2.73               | 2.251                 | 2.214 | 2.174 | 2.369                            | 2.553 | 2.754 | 82.61 | 81.26 | 79.79 |
| 2.80   | 3.05               | 2.209                 | 2.198 | 2.193 | 4.214                            | 4.268 | 4.293 | 72.39 | 72.03 | 71.86 |
| 3.00   | 3.27               | 2.292                 | 2.250 | 2.199 | 4.891                            | 5.099 | 5.355 | 70.08 | 68.81 | 67.24 |

**Table S18.** Isothermal adsorption of Na-MT2 for CTAC at different temperature.

| Amount |        | Adsorbance, mmol/g |       |       | Equilibrium concentration, mmol/L |       |       | Adsorption efficiency $\eta$ , % |       |       |
|--------|--------|--------------------|-------|-------|-----------------------------------|-------|-------|----------------------------------|-------|-------|
|        |        |                    |       |       | 25°C                              | 50°C  | 80°C  |                                  |       |       |
| CEC    | mmol/g | 25°C               | 50°C  | 80°C  | 25°C                              | 50°C  | 80°C  | 25°C                             | 50°C  | 80°C  |
| 0.50   | 0.55   | 0.544              | 0.543 | 0.543 | 0.006                             | 0.008 | 0.011 | 99.77                            | 99.71 | 99.59 |
| 0.70   | 0.76   | 0.761              | 0.760 | 0.759 | 0.011                             | 0.013 | 0.018 | 99.71                            | 99.66 | 99.53 |
| 1.00   | 1.09   | 1.084              | 1.085 | 1.084 | 0.029                             | 0.026 | 0.032 | 99.46                            | 99.52 | 99.40 |
| 1.30   | 1.42   | 1.410              | 1.409 | 1.407 | 0.036                             | 0.041 | 0.049 | 99.50                            | 99.43 | 99.31 |
| 1.50   | 1.64   | 1.620              | 1.618 | 1.616 | 0.077                             | 0.086 | 0.096 | 99.06                            | 98.94 | 98.82 |
| 1.70   | 1.85   | 1.822              | 1.819 | 1.816 | 0.154                             | 0.170 | 0.186 | 98.34                            | 98.17 | 97.99 |
| 2.00   | 2.18   | 2.104              | 2.099 | 2.095 | 0.382                             | 0.407 | 0.423 | 96.49                            | 96.27 | 96.12 |
| 2.30   | 2.51   | 2.342              | 2.334 | 2.321 | 0.824                             | 0.865 | 0.930 | 93.43                            | 93.10 | 92.58 |
| 2.50   | 2.73   | 2.408              | 2.402 | 2.392 | 1.585                             | 1.616 | 1.666 | 88.37                            | 88.14 | 87.77 |
| 2.80   | 3.05   | 2.437              | 2.414 | 2.401 | 3.073                             | 3.188 | 3.253 | 79.86                            | 79.11 | 78.68 |
| 3.00   | 3.27   | 2.508              | 2.443 | 2.410 | 3.809                             | 4.136 | 4.300 | 76.70                            | 74.70 | 73.70 |

**Table S19.** Isothermal adsorption of Na-MT2 for OTAC at different temperature.

| Amount |        | Adsorbance, mmol/g |       |       | Equilibrium concentration, mmol/L |       |       | Adsorption efficiency $\eta$ , % |       |       |
|--------|--------|--------------------|-------|-------|-----------------------------------|-------|-------|----------------------------------|-------|-------|
|        |        |                    |       |       | 25°C                              | 50°C  | 80°C  |                                  |       |       |
| CEC    | mmol/g | 25°C               | 50°C  | 80°C  | 25°C                              | 50°C  | 80°C  | 25°C                             | 50°C  | 80°C  |
| 0.50   | 0.55   | 0.544              | 0.544 | 0.544 | 0.002                             | 0.003 | 0.004 | 99.89                            | 99.84 | 99.76 |
| 0.70   | 0.76   | 0.762              | 0.761 | 0.760 | 0.004                             | 0.007 | 0.009 | 99.83                            | 99.72 | 99.66 |
| 1.00   | 1.09   | 1.087              | 1.087 | 1.086 | 0.009                             | 0.010 | 0.014 | 99.76                            | 99.73 | 99.61 |
| 1.30   | 1.42   | 1.412              | 1.411 | 1.410 | 0.016                             | 0.020 | 0.023 | 99.67                            | 99.58 | 99.52 |
| 1.50   | 1.64   | 1.630              | 1.629 | 1.627 | 0.017                             | 0.021 | 0.026 | 99.69                            | 99.61 | 99.53 |
| 1.70   | 1.85   | 1.838              | 1.836 | 1.832 | 0.050                             | 0.057 | 0.071 | 99.20                            | 99.08 | 98.85 |
| 2.00   | 2.18   | 2.151              | 2.148 | 2.139 | 0.096                             | 0.108 | 0.136 | 98.68                            | 98.52 | 98.13 |
| 2.30   | 2.51   | 2.427              | 2.420 | 2.403 | 0.267                             | 0.289 | 0.345 | 96.80                            | 96.55 | 95.87 |
| 2.50   | 2.73   | 2.507              | 2.490 | 2.481 | 0.727                             | 0.784 | 0.812 | 91.99                            | 91.37 | 91.06 |
| 2.80   | 3.05   | 2.520              | 2.511 | 2.499 | 1.774                             | 1.802 | 1.845 | 82.56                            | 82.28 | 81.87 |
| 3.00   | 3.27   | 2.555              | 2.543 | 2.513 | 2.382                             | 2.425 | 2.524 | 78.14                            | 77.75 | 76.85 |

**Table S20.** Adsorption thermodynamic parameters of Na-MT1 for DTAC.

| Amount (CEC) | $\Delta S$ J/(K•mol) | $\Delta H$ kJ/mol | $\Delta G$ , kJ/mol |        |         |
|--------------|----------------------|-------------------|---------------------|--------|---------|
|              |                      |                   | 298k                | 323k   | 353k    |
| 0.5          | 11.631               | -5.778            | -9.244              | -9.535 | -9.884  |
| 0.7          | 11.872               | -5.889            | -9.143              | -9.635 | -10.226 |
| 1.0          | 18.532               | -2.151            | -7.940              | -8.219 | -8.554  |
| 1.3          | 13.369               | -1.443            | -5.427              | -5.761 | -6.162  |
| 1.5          | 8.929                | -0.601            | -3.262              | -3.485 | -3.753  |



|     |         |        |        |        |        |
|-----|---------|--------|--------|--------|--------|
| 1.7 | 5.504   | -1.195 | -2.835 | -2.973 | -3.138 |
| 2.0 | 1.064   | -0.642 | -0.959 | -0.986 | -1.018 |
| 2.3 | -6.294  | -1.761 | 0.115  | 0.272  | 0.461  |
| 2.5 | -13.959 | -3.650 | 0.510  | 0.859  | 1.278  |
| 2.8 | -12.371 | -2.236 | 1.451  | 1.760  | 2.131  |
| 3.0 | -13.236 | -2.037 | 1.907  | 2.238  | 2.635  |

**Table S21.** Adsorption thermodynamic parameters of Na-MT1 for TTAC.

| Amount<br>(CEC) | $\Delta S$<br>J/(K•mol) | $\Delta H$<br>kJ/mol | $\Delta G$ , kJ/mol |        |         |
|-----------------|-------------------------|----------------------|---------------------|--------|---------|
|                 |                         |                      | 298k                | 323k   | 353k    |
| 0.5             | 13.286                  | -5.614               | -9.573              | -9.905 | -10.304 |
| 0.7             | 19.022                  | -2.592               | -8.261              | -8.736 | -9.307  |
| 1.0             | 21.758                  | -1.887               | -8.371              | -8.915 | -9.568  |
| 1.3             | 9.736                   | -2.669               | -5.570              | -5.814 | -6.106  |
| 1.5             | 2.777                   | -3.270               | -4.098              | -4.167 | -4.250  |
| 1.7             | 1.746                   | -2.956               | -3.476              | -3.520 | -3.572  |
| 2.0             | 0.507                   | -1.384               | -1.535              | -1.548 | -1.563  |
| 2.3             | 0.374                   | -0.177               | -0.288              | -0.298 | -0.309  |
| 2.5             | -7.790                  | -2.148               | 0.173               | 0.368  | 0.602   |
| 2.8             | -9.112                  | -1.663               | 1.052               | 1.280  | 1.554   |
| 3.0             | -11.997                 | -2.045               | 1.530               | 1.830  | 2.190   |

**Table S22.** Adsorption thermodynamic parameters of Na-MT1 for CTAC.

| Amount<br>(CEC) | $\Delta S$<br>J/(K•mol) | $\Delta H$<br>kJ/mol | $\Delta G$ , kJ/mol |         |         |
|-----------------|-------------------------|----------------------|---------------------|---------|---------|
|                 |                         |                      | 298k                | 323k    | 353k    |
| 0.5             | 14.956                  | -5.514               | -9.972              | -10.346 | -10.794 |
| 0.7             | 17.633                  | -4.383               | -9.642              | -10.082 | -10.611 |
| 1.0             | 23.345                  | -2.161               | -9.118              | -9.701  | -10.402 |
| 1.3             | 18.955                  | -3.417               | -9.063              | -9.537  | -10.105 |
| 1.5             | 6.867                   | -6.910               | -8.962              | -9.134  | -9.340  |
| 1.7             | 1.896                   | -7.261               | -7.826              | -7.873  | -7.930  |
| 2.0             | 2.752                   | -4.764               | -5.584              | -5.653  | -5.735  |
| 2.3             | 2.760                   | -2.762               | -3.584              | -3.653  | -3.736  |
| 2.5             | 1.122                   | -0.754               | -1.088              | -1.116  | -1.150  |
| 2.8             | -3.849                  | -1.236               | -0.089              | 0.007   | 0.123   |

|     |         |        |       |       |       |
|-----|---------|--------|-------|-------|-------|
| 3.0 | -12.080 | -3.388 | 0.212 | 0.514 | 0.876 |
|-----|---------|--------|-------|-------|-------|

**Table S23.** Adsorption thermodynamic parameters of Na-MT1 for OTAC.

| Amount<br>(CEC) | $\Delta S$<br>J/(K•mol) | $\Delta H$<br>kJ/mol | $\Delta G$ , kJ/mol |         |         |
|-----------------|-------------------------|----------------------|---------------------|---------|---------|
|                 |                         |                      | 298k                | 323k    | 353k    |
| 0.5             | 6.660                   | -8.863               | -10.848             | -11.014 | -11.214 |
| 0.7             | 8.480                   | -8.114               | -10.641             | -10.853 | -11.107 |
| 1.0             | 18.914                  | -5.047               | -10.683             | -11.156 | -11.724 |
| 1.3             | 14.832                  | -5.379               | -9.799              | -10.170 | -10.615 |
| 1.5             | 5.703                   | -6.871               | -8.570              | -8.713  | -8.884  |
| 1.7             | 2.087                   | -6.867               | -7.489              | -7.541  | -7.604  |
| 2.0             | 1.829                   | -6.061               | -6.606              | -6.652  | -6.707  |
| 2.3             | 0.939                   | -4.135               | -4.415              | -4.438  | -4.466  |
| 2.5             | 3.525                   | -1.223               | -2.273              | -2.362  | -2.467  |
| 2.8             | 0.283                   | -0.515               | -0.599              | -0.606  | -0.615  |
| 3.0             | -6.842                  | -2.055               | -0.274              | 0.047   | 0.433   |

**Table S24.** Adsorption thermodynamic parameters of Na-MT2 for DTAC.

| Amount<br>(CEC) | $\Delta S$<br>J/(K•mol) | $\Delta H$<br>kJ/mol | $\Delta G$ , kJ/mol |        |        |
|-----------------|-------------------------|----------------------|---------------------|--------|--------|
|                 |                         |                      | 298k                | 323k   | 353k   |
| 0.5             | 8.971                   | -0.698               | -3.371              | -3.596 | -3.865 |
| 0.7             | 11.665                  | -5.455               | -8.931              | -9.223 | -9.573 |
| 1.0             | 18.948                  | -0.685               | -6.332              | -6.805 | -7.374 |
| 1.3             | 11.432                  | -0.981               | -4.388              | -4.674 | -5.016 |
| 1.5             | 6.734                   | -1.502               | -3.509              | -3.677 | -3.879 |
| 1.7             | 3.592                   | -1.693               | -2.763              | -2.853 | -2.961 |
| 2.0             | 0.881                   | -1.226               | -1.489              | -1.511 | -1.537 |
| 2.3             | -8.198                  | -1.906               | 0.537               | 0.742  | 0.988  |
| 2.5             | -14.342                 | -3.159               | 1.115               | 1.473  | 1.904  |
| 2.8             | -17.809                 | -3.442               | 1.865               | 2.310  | 2.845  |
| 3.0             | -22.780                 | -4.677               | 2.111               | 2.681  | 3.364  |

**Table S25.** Adsorption thermodynamic parameters of Na-MT2 for TTAC.

| Amount<br>(CEC) | $\Delta S$<br>J/(K•mol) | $\Delta H$<br>kJ/mol | $\Delta G$ , kJ/mol |      |      |
|-----------------|-------------------------|----------------------|---------------------|------|------|
|                 |                         |                      | 298k                | 323k | 353k |

|     |         |        |         |         |         |
|-----|---------|--------|---------|---------|---------|
| 0.5 | 15.181  | -5.604 | -10.128 | -10.507 | -10.963 |
| 0.7 | 21.059  | -2.594 | -8.870  | -9.396  | -10.028 |
| 1.0 | 21.292  | -2.203 | -8.548  | -9.080  | -9.719  |
| 1.3 | 11.119  | -2.569 | -5.882  | -6.160  | -6.494  |
| 1.5 | 5.637   | -3.775 | -5.455  | -5.596  | -5.765  |
| 1.7 | 8.572   | -2.515 | -5.069  | -5.284  | -5.541  |
| 2.0 | 2.785   | -2.174 | -3.004  | -3.074  | -3.157  |
| 2.3 | 0.324   | -0.416 | -0.513  | -0.521  | -0.530  |
| 2.5 | -10.309 | -2.946 | 0.126   | 0.384   | 0.693   |
| 2.8 | -6.768  | -0.495 | 1.522   | 1.691   | 1.894   |
| 3.0 | -13.336 | -2.100 | 1.874   | 2.208   | 2.608   |

**Table S26.** Adsorption thermodynamic parameters of Na-MT2 for CTAC.

| Amount<br>(CEC) | $\Delta S$<br>J/(K•mol) | $\Delta H$<br>kJ/mol | $\Delta G$ , kJ/mol |         |         |
|-----------------|-------------------------|----------------------|---------------------|---------|---------|
|                 |                         |                      | 298k                | 323k    | 353k    |
| 0.5             | 6.327                   | -9.179               | -11.064             | -11.223 | -11.412 |
| 0.7             | 10.609                  | -7.341               | -10.502             | -10.768 | -11.086 |
| 1.0             | 24.718                  | -1.723               | -9.089              | -9.707  | -10.448 |
| 1.3             | 13.119                  | -4.997               | -8.906              | -9.234  | -9.628  |
| 1.5             | 12.970                  | -3.666               | -7.531              | -7.855  | -8.244  |
| 1.7             | 10.135                  | -3.128               | -6.148              | -6.402  | -6.706  |
| 2.0             | 8.514                   | -1.676               | -4.213              | -4.426  | -4.681  |
| 2.3             | 1.754                   | -2.075               | -2.598              | -2.642  | -2.694  |
| 2.5             | 0.449                   | -0.909               | -1.043              | -1.054  | -1.067  |
| 2.8             | -5.570                  | -1.141               | 0.519               | 0.658   | 0.825   |
| 3.0             | -10.093                 | -1.857               | 1.151               | 1.403   | 1.706   |

**Table S27.** Adsorption thermodynamic parameters of Na-MT2 for OTAC.

| Amount<br>(CEC) | $\Delta S$<br>J/(K•mol) | $\Delta H$<br>kJ/mol | $\Delta G$ , kJ/mol |         |         |
|-----------------|-------------------------|----------------------|---------------------|---------|---------|
|                 |                         |                      | 298k                | 323k    | 353k    |
| 0.5             | 2.927                   | -13.117              | -13.989             | -14.062 | -14.150 |
| 0.7             | 5.878                   | -10.900              | -12.652             | -12.799 | -12.975 |
| 1.0             | 13.294                  | -8.106               | -12.068             | -12.400 | -12.799 |
| 1.3             | 17.301                  | -5.956               | -11.112             | -11.544 | -12.063 |
| 1.5             | 16.212                  | -6.449               | -11.280             | -11.685 | -12.172 |

|     |        |        |        |        |        |
|-----|--------|--------|--------|--------|--------|
| 1.7 | 10.958 | -5.723 | -8.988 | -9.262 | -9.591 |
| 2.0 | 7.300  | -5.572 | -7.747 | -7.930 | -8.149 |
| 2.3 | 4.332  | -4.218 | -5.509 | -5.617 | -5.747 |
| 2.5 | 3.799  | -1.916 | -3.048 | -3.143 | -3.257 |
| 2.8 | 0.391  | -0.756 | -0.873 | -0.882 | -0.894 |
| 3.0 | -3.351 | -1.185 | -0.186 | -0.103 | -0.002 |

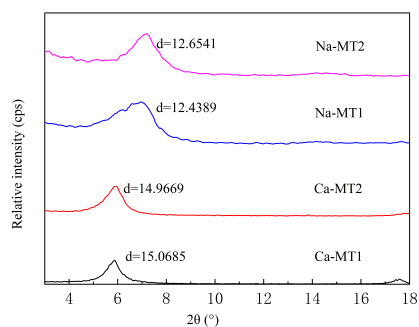

**Figure S1.** XRD patterns of different types of MT.

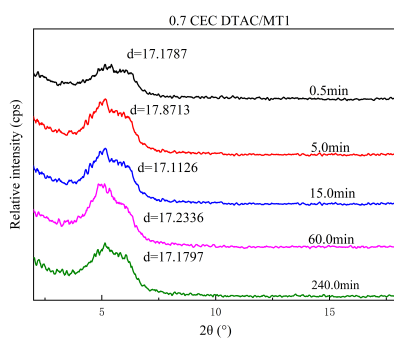

(a)

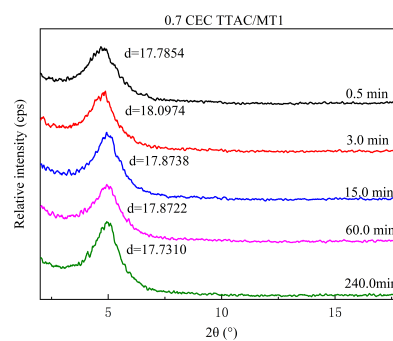

(b)

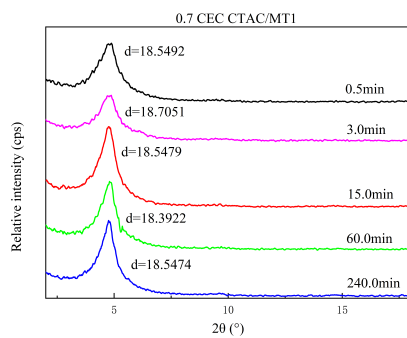

(c)

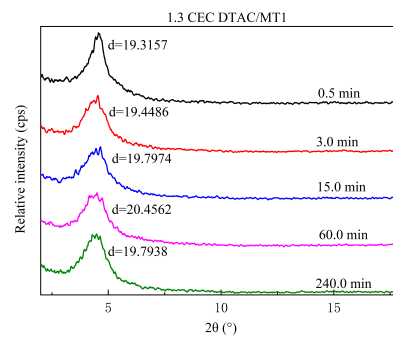

(d)

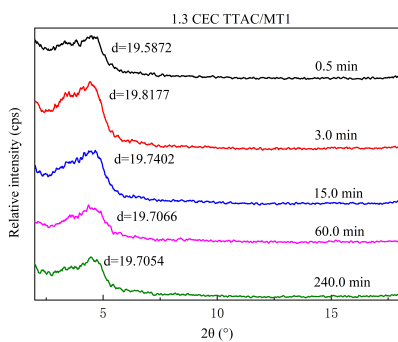

(e)

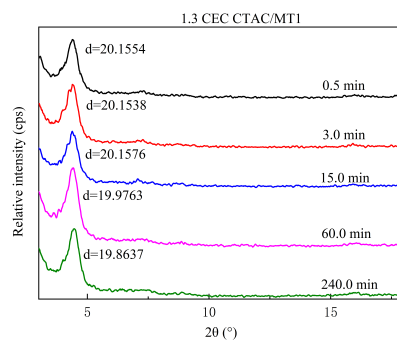

(f)

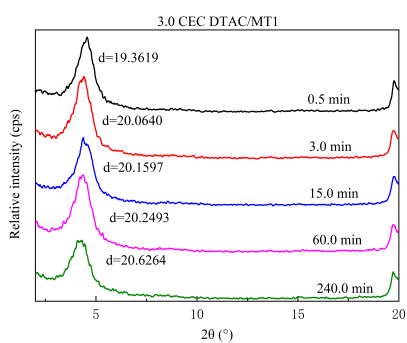

(g)

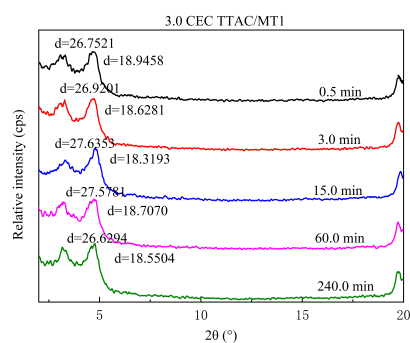

(h)

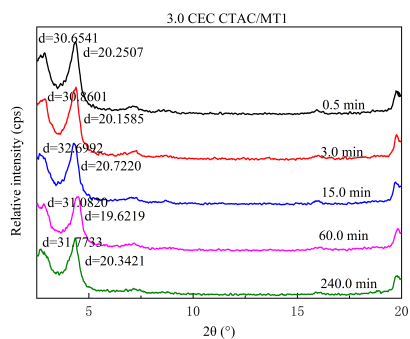

(i)

**Figure S2.** XRD patterns of alkylammonium/Na-MT1 prepared under different conditions, (a) 0.7 CEC, DTAC/MT1, (b) 0.7 CEC, TTAC/MT1, (c) 0.7 CEC, CTAC/MT1, (d) 1.3 CEC, DTAC/MT1, (e) 1.3 CEC, TTAC/MT1, (f) 1.3 CEC, CTAC/MT1, (g) 3.0 CEC, DTAC/MT1, (h) 3.0 CEC, TTAC/MT1, (i) 3.0 CEC, CTAC/MT1.
